1 **Genetic Structure and Diversity of Banana Bunchy Top Virus (BBTV) in the**  
2 **Philippines**

3

4 Jay-Vee S. Mendoza<sup>1</sup>, Fe M. dela Cueva<sup>1\*</sup>, Cris Q. Cortaga<sup>1</sup>, Anand Noel C. Manohar<sup>1</sup>,  
5 Roanne R. Gardoce<sup>1</sup>, Grace C. Lachica<sup>1,2</sup>, Maricel C. Gonzales<sup>1</sup>, John E. Thomas<sup>3</sup>, and Darlon  
6 V. Lantican<sup>1\*</sup>

7

8 *<sup>1</sup>Institute of Plant Breeding, College of Agriculture and Food Science*

9 *<sup>2</sup>Philippine Genome Center-Agriculture, Livestock & Fisheries Program*

10 *University of the Philippines Los Baños (UPLB), College, Laguna 4031, Philippines*

11 *<sup>3</sup>The University of Queensland Ecosciences Precinct, Level 2C west, GPO Box 267,*  
12 *Brisbane, Queensland 4001, Australia*

13

14 *\*Corresponding authors: [fmdelacueva@up.edu.ph](mailto:fmdelacueva@up.edu.ph); [dvlantican@up.edu.ph](mailto:dvlantican@up.edu.ph)*

15

16 **Key words:** Banana bunchy top virus (BBTV), banana, DNA-R, genetic diversity, genetic  
17 structure

18

19

20

21

22

23

24

25

26 **Abstract**

27 Banana bunchy top virus (BBTV) is an important disease of banana in the Philippines and in  
28 other banana-producing countries. This study was conducted to investigate the genetic structure  
29 and diversity of Philippine BBTV isolates which remain unexplored in the country. BBTV-  
30 infected plant tissues were sampled from banana-growing provinces (i.e., Cagayan, Isabela,  
31 Quirino, Batangas, Laguna, Rizal, Quezon, Palawan, Cebu, Leyte, and Davao del Sur) and the  
32 partial DNA-R gene of BBTV was sequenced. Analysis of all local BBTV isolates showed a  
33 nucleotide diversity ( $\pi$ ) of 0.00721, average number of nucleotide differences ( $k$ ) of 5.51984,  
34 and haplotype diversity ( $hd$ ) of 0.971. Neutrality tests using Fu's  $F_s$  and Tajima's  $D$  showed  
35 significant and highly negative values which suggest an excess number of rare alleles due to  
36 recent population expansion or from genetic hitchhiking. Haplotype network and phylogenetic  
37 analyses revealed that the local BBTV isolates were closely related to Southeast Asian (SEA)  
38 group and exhibited a monophyletic clade with distinct haplotype grouping from other SEA  
39 sequences. However, some Indonesian and Indian reference sequences were also clustered  
40 within the Philippine BBTV group suggesting sequence homology. Results also showed that  
41 the local BBTV isolates may be categorized into three major haplotype groups (HA, HB, and  
42 HC) but only the HC group remained distinct upon comparison with other Philippine and SEA  
43 reference sequences. BBTV isolates from Quezon were the most diverse while isolates from  
44 Palawan displayed low genetic diversity indices and belonged only in the HC group. The  
45 assessment of the degree of variability among Philippine BBTV isolates will provide a  
46 reference towards the development of high-throughput BBTV detection systems as well as  
47 enable to devise plant breeding strategies to manage the current BBTV spread and variations.

48

49

50

## 51 **Introduction**

52           Banana bunchy top disease (BBTD) is one of the major threats in banana producing  
53 countries such as India, China, Taiwan, Indonesia and the Philippines (Debbarma et al., 2019;  
54 Qazi, 2016). In the Philippines, BBTD is present in almost all banana-growing areas. The  
55 disease affects both smallholders and large banana plantation growers. Spread of the disease  
56 can be minimized through elimination of infected materials and use of virus-free tissue culture-  
57 derived planting materials. These management strategies are usually employed by big  
58 commercial growers instead of the smallholders. In the 1990s, smallholder production of the  
59 popular dessert cv. Lakatan in the northern Philippines was virtually eliminated by severe  
60 BBTD infection (Molina et al., 2009). Initial symptoms of the disease involve the appearance  
61 of dark green streaks in the veins which becomes apparent with a combination of marginal  
62 chlorosis or yellowing of the leaves. Dashes and dots creating a “Morse code” pattern in the  
63 leaves and petiole may also be observed. This will lead into small emerging bunchy leaves  
64 forming a rosette pattern. In serious cases, disease plants were observed to be severely stunted  
65 and unable to bear fruits (Dale 1987; Hooks et al., 2008).

66           The disease is known to be caused by Banana bunchy top virus (BBTV), a single-  
67 stranded DNA virus belonging to the Babuvirus genus, which can bring catastrophic loss to a  
68 banana plantation. The systemic virus can easily be transmitted by an aphid (*Pentalonia*  
69 *nigronevosa*; Magee, 1927), a vector with a wide host range including *Musa textilis* and other  
70 members of the family Musaceae. The disease transmission is of the persistent, circulative,  
71 non-propagative type (Anhalt and Almeida, 2008), with efficiency ranging from 46-67%  
72 (Magee, 1927; Wu and Su., 1990; Hu et al., 1996). The virus is made up of 6 genetic  
73 components, namely, DNA-C coding for the cell cycle link protein, DNA-S coding for the  
74 capsid protein, DNA-M coding for the movement protein, DNA-N coding for the nuclear  
75 shuttle protein, DNA-U3 coding for potential protein with unknown function, and DNA-R

76 coding for the replication initiation protein (Amin et al., 2008, Kumar et al., 2017;  
77 Wickramaarachchi et al., 2016).

78         The phylogenetic relationship among BBTV DNA-R sequences revealed that the virus  
79 can be categorized into two different lineages based on geographical distribution: the South  
80 Pacific/ Pacific-Indian Oceans (PIO) group and the Asian/ Southeast Asian (SEA) group (Yu  
81 et al., 2012; Karan et al., 1994). BBTV isolates obtained from Australia, Egypt, Hawaii, India,  
82 Myanmar, Pakistan, Sri Lanka and Tonga belong under the PIO group, while the isolates  
83 collected from China, Indonesia, Japan, Philippines, Taiwan and Vietnam are considered  
84 members of the SEA group (Yu et al., 2012).

85         In-depth studies on the diversity of BBTV from various countries were already  
86 reported, such as in Democratic Republic of Congo (Mukwa et al., 2016), Pakistan (Amin et  
87 al., 2007), sub-Saharan Africa (Kumar et al., 2011), Indonesia (Chiaki et al., 2015), Japan  
88 (Furuya et al., 2005) and India (Banerjee et al., 2014). The information on the degree of genetic  
89 diversity and distribution of BBTV in these countries provided useful and fundamental  
90 information to control BBTD through various pest management approaches. Unfortunately, the  
91 reported BBTV sequences from the Philippines have only been made available through foreign  
92 efforts, which generally aims to provide insights into BBTV diversity and population structure  
93 at the global level. Local and intensive reports regarding the diversity and spread of this  
94 important banana disease will be vital towards devising a specific management system in the  
95 country. Thus, a detailed assessment of the current Philippine BBTV diversity and genetic  
96 structure using the DNA-R region will be discussed in this paper.

97

98

99

100

## 101 **Materials and Methods**

102

### 103 **Survey and collection**

104 A survey was done in banana growing areas in the Philippines (Figure 1). Symptoms depicting  
105 classic BBTV infection such as leaf chlorosis, dash-dot pattern, rosetting, and stunting were  
106 observed and recorded. Leaf samples from representative symptomatic and asymptomatic  
107 samples were collected and processed for DNA extraction.

108

### 109 **DNA extraction**

110 Samples were processed using a CTAB DNA extraction protocol adapted from Doyle and  
111 Doyle (1990) with a few modifications. Approximately, 300 mg of fresh leaf tissue was ground  
112 into fine powder with liquid nitrogen using a sterilized mortar and pestle. Ground tissue was  
113 then transferred into a sterilized 1.5 ml microcentrifuge tube. Exactly 700 µl of extraction  
114 buffer with 2% PVP was added to each sample and then incubated at 65 °C for an hour. One  
115 volume CH<sub>3</sub>Cl-isoamyl alcohol (24:1) was added followed by centrifugation at 10,000 rpm for  
116 10 minutes at 23 °C. Aqueous phase was transferred into a new sterile 1.5 ml microcentrifuge  
117 tube. DNA was precipitated by adding 0.8 volume of cold isopropanol and incubated at -20 °C  
118 for 30 minutes, followed by centrifugation at 10,000 rpm for 15 minutes. The DNA pellet was  
119 washed using 1 mL of Wash 1 (0.2 M sodium acetate, 76% ethanol; filter sterilized) for 10  
120 minutes followed by 1 ml of Wash 2 (10 mM ammonium acetate, 76% ethanol; filter sterilized)  
121 for 5 minutes, and the pellet was air-dried for 30 minutes. The DNA pellet was resuspended in  
122 Tris-EDTA buffer (10 mM Tris-HCl, 1 mM disodium EDTA, pH 8.0) and purified by  
123 incubation with 0.1 mg/ml RNase at 37 °C for 1 hour, and centrifugation at 10,000 rpm for 5  
124 minutes. DNA was collected into individual sterile 1.5 ml microcentrifuge tubes and stored at  
125 -20 °C.

126 **PCR detection**

127 The presence of BBTV was confirmed by performing PCR detection. Each 15 µL reaction  
128 mixture is consisting of 1X PCR buffer (10 mM Tris pH 9.1 at 20 °C, 50 mM KCl, 0.01%  
129 Triton™ X-100; Vivantis Technologies, Malaysia), 1.76 mM MgCl<sub>2</sub>, 0.2mM dNTPs, 2 µM of  
130 BBT1 (5'-CTC GTC ATG TGC AAG GTT ATG TCG-3') and BBT2 (5'-GAA GTT CTC  
131 CAG CTA TTC ATC GCC-3') primers (Thompson and Dietzgen, 1995; Harding et al., 1993;  
132 Integrated DNA Technologies Pte. Ltd., Singapore), 1U of Taq Polymerase (Vivantis  
133 Technologies, Malaysia), and 20 ng DNA. The PCR mixture was then run in a T100 thermal  
134 cyclor (BioRad, USA) with initial denaturation at 94 °C for 10 minutes, followed by 30 cycles  
135 of 94 °C for 1 minute, 53 C for 1 minute, 72 °C for 2 minutes and a final extension of 72 °C  
136 for 10 minutes. PCR products were viewed with electrophoresis using 1% agarose gels in 1X  
137 TBE buffer at 100 V for 40 min and visualized using 0.5 ug/ml ethidium bromide staining and  
138 UV illumination using the Enduro GDS Touch Imaging System (Labnet International, Inc,  
139 Edison, New Jersey, USA).

140

141 **Outsourced sequencing**

142 Confirmed BBTV isolates were further processed for the partial sequencing of the DNA-R  
143 region of the virus (Table 1). PCR amplification was done using previously established primers  
144 for assessing genetic similarity (Islam et al., 2010): BBTVREP-F (5'- ATG GCG CGA TAT  
145 GTG GTA TGC -3') and BBTVREP-R (5'-TCA GCA AGA AAC CAA CTT TAT TCG - 3').  
146 The DNA-R primer was optimized using the same PCR conditions as BBT1 and BBT2 primers.  
147 PCR products were then sent for outsourced capillary sequencing (Apical Scientific, Malaysia).

148

149

150

## 151 **Sequence analysis**

152 Raw paired sequences (forward and reverse) were quality trimmed and analyzed using  
153 Geneious Prime® (version 2019.0.4). Trimmed and assembled sequences were then aligned  
154 using ClustalW (Thompson et al., 2003) at default settings. Resulting alignment was then used  
155 for phylogenetic analysis. The partial DNA-R sequences from collected BBTV samples were  
156 compared with published reference sequences in NCBI (Appendix Table 1) to determine its  
157 relation to the South Pacific group and Asian group and to confirm the identity of the virus.  
158 Two (2) Abaca bunchy top virus (ABTV) reference sequences (accession numbers:  
159 EF546813.1, EF546807.1) served as outgroups in the analysis.

160

## 161 **Genetic diversity and demographic analyses**

162 Parameters of genetic diversity and demographic analysis using the partial DNA-R gene of  
163 BBTV populations isolated in the Philippines were computed using DNA Sequence  
164 Polymorphism (DnaSP) (Rozas et al., 2017). The estimates of evolutionary divergence (genetic  
165 distance) over sequence pairs between and within population (inter- and intra-population,  
166 respectively) of BBTV isolates were computed using Molecular Evolutionary Genetics  
167 Analysis (MEGA X) (Kumar et al., 2018) based on T93 nucleotide substitution model (Tamura  
168 and Nei 1993). The rate variation among sites was modeled with a gamma distribution (+G)  
169 and discreet evolutionary invariable sites (+I).

170

## 171 **Haplotype network and phylogenetic analyses**

172 Based on DNA-R sequence of BBTV, two haplotype networks were constructed using  
173 Population Analysis with Reticulate Trees (PopART) (Leigh and Bryant, 2015): (1) median  
174 joining network of collected Philippine isolates; and (2) minimum spanning network of  
175 collected Philippine isolates with other published reference sequences from the Philippines and

176 SEA. The BBTV phylogenetic tree was reconstructed using the maximum likelihood statistical  
177 method implemented in IQ-TREE (Nguyen et al., 2015) with best-fit substitution model  
178 selected based on Bayesian information criterion (BIC) through ModelFinder  
179 (Kalyaanamoorthy et al., 2017). The tree was generated using TIM2 model (AC=AT, CG=GT  
180 and unequal base frequency; Posada 2008) with empirical base frequencies (+F) and FreeRate  
181 heterogeneity across sites model (+R3) (Yang, 1995; Soubrier et al., 2012). The resulting  
182 phylogenetic tree was validated with 1,000 replicates of ultrafast bootstrapping (Hoang et al.,  
183 2018) and visualized using FigTree (Rambaut, 2018).

184

## 185 **Results**

186

### 187 **Genetic diversity and demographic analysis**

188 Banana leaves showing characteristic symptoms of banana bunchy top disease (BBTD) were  
189 collected from 11 banana growing areas in the country, namely, Cagayan, Isabela, Quirino,  
190 Batangas, Laguna, Rizal, Quezon, Palawan, Cebu, Leyte, and Davao del Sur (Figure 1). Among  
191 the BBTV populations with partial DNA-R sequences (Table 1), the highest number of  
192 segregating sites (S) was observed in Quezon and Batangas (S=25 and 28, respectively) while  
193 the lowest was observed in Rizal and Cebu (S=6) (Table 2). The nucleotide diversity ( $\pi$ ) was  
194 highest in Quezon ( $\pi=0.00893$ ) and lowest in Rizal ( $\pi=0.00385$ ). The average number of  
195 nucleotide differences (k) was highest in Quezon, Cebu, and Leyte (ranging from 6 to 6.897)  
196 and lowest in Rizal, Palawan, and Leyte (ranging from 3 to 3.2). The number of haplotype (h)  
197 was highest in Batangas and Quezon (h=12) with relatively high haplotype diversity (hd) of  
198 0.967 and 0.987, respectively. A high haplotype diversity (hd) of 1 was observed in Cebu (h=2),  
199 Laguna (h=8), and Davao del Sur (h=5) as the haplotype number in these locations  
200 corresponded to the number of samples obtained. Lowest haplotype diversity (hd) was



201 observed in Palawan (0.644). Analysis of all Philippine BBTV populations showed 59 total  
202 segregating sites ( $S$ ) with nucleotide diversity ( $\pi$ ) of 0.0021 and average number of nucleotide  
203 differences ( $k$ ) of 5.51984, while the haplotype number ( $h$ ) was 41 with haplotype diversity  
204 ( $hd$ ) of 0.971.

205

206 For the test of neutrality (Table 2), significantly ( $P < 0.02$ ) negative Fu's  $F_s$  was observed in  
207 BBTV population from Batangas (-5.478), Laguna (-4.309), and Quezon (-5.026) (Table 2),  
208 while only Batangas has significantly ( $P < 0.05$ ) negative Tajima's  $D$  (-1.80970). Meanwhile,  
209 Tajima's  $D$  was not computed for Cebu samples due to small sample size. Analysis of all  
210 Philippine BBTV isolates showed a significant and highly negative Fu's  $F_s$  (-33.210) and  
211 Tajima's  $D$  (-1.98369).

212

213 BBTV isolates from Cebu, Leyte, Davao del Sur, Quezon, Laguna, and Batangas showed the  
214 highest inter-population genetic distance with Isabela isolates (ranging from 0.009 to 0.011),  
215 while BBTV isolates from Quirino, Cagayan, Palawan, and Rizal showed the highest inter-  
216 population genetic distance with Batangas isolates (ranging from 0.007 to 0.010) (Table 3).  
217 Intra-population genetic distance was highest in Quezon isolates, while Rizal isolates showed  
218 the lowest.

219

220 The data on genetic diversity, demographic analysis, and intra-population genetic distance  
221 were not computed for BBTV isolates from Cagayan, Isabela, and Quirino as only one  
222 representative isolate was obtained from each location.

223

224

225

## 226 **Haplotype analysis**

227 Haplotype network of BBTV samples isolated from the Philippines revealed three major  
228 haplotype groups (HA, HB, and HC) using the partial DNA-R gene (Figure 2a). The first  
229 haplotype group (HA) includes isolates from Laguna, Batangas, and Quezon which are  
230 provinces from the Luzon region. The second haplotype group (HB) includes isolates from  
231 Laguna and Quezon (Luzon region), Cebu and Leyte (Visayas region), and Davao del Sur  
232 (Mindanao region). The third haplotype group (HC) includes isolates from all sampled  
233 provinces (except Laguna and Batangas). Interestingly, all Palawan isolates were included in  
234 this haplotype group only. Additional BBTV samples and genes will be analyzed to confirm  
235 the haplotype groupings observed.

236

237 Using the DNA-R gene, a SEA haplotype network consisting of collected Philippine isolates  
238 and reference sequences from the Philippines and SEA was constructed (Figure 2b). It showed  
239 distinct grouping of Philippine isolates from its neighboring Asian countries (such as  
240 Indonesia, Taiwan, Japan), while China and Vietnam showed the most distant haplotype  
241 grouping. Here, the HC group remains distinct wherein BBTV sequences from Indonesia (n=2)  
242 and India (n=1) were also included.

243

## 244 **Phylogenetic analysis**

245 Phylogenetic analysis showed two broad clades/groups of BBTV, namely, the SEA and PIO  
246 groups, with high bootstrap support values of 88% and 90%, respectively (Figure 3). All  
247 Philippine BBTV sequences were found in the SEA clade. The Philippine reference sequences  
248 and Philippine BBTV isolates in this study clustered together wherein sequences from  
249 Indonesia (n=8) and India (n=1) were also included. BBTV sequences from India and Egypt  
250 were both found in SEA and PIO clades. Notably, the clustering of Philippine BBTV isolates

251 appeared to follow the three haplotype groupings observed in this study (HA, HB, and HC).  
252 Philippine reference sequences were found among the HA and HB isolates but not on HC  
253 isolates. On the other hand, Indonesian sequences were found among HB and HC isolates,  
254 while an Indian BBTV sequence was found among HC isolates. In the SEA clade, China and  
255 Vietnam sequences formed a separate cluster from the rest of SEA sequences with a well-  
256 supported bootstrap value of 82%.

257

## 258 **Discussion**

259 Banana bunchy top disease has been an important disease of the banana crop in the Philippines  
260 (Molina et al., 2009). Molecular information regarding the Philippine BBTV isolates has been  
261 lacking and remains unexplored. Thus, this study was performed to investigate the genetic  
262 structure and diversity of the BBTV isolates in the Philippines. Here, the partial DNA-R region  
263 of BBTV was sequenced due to its wide application in assessing genetic diversity and other  
264 molecular analyses (Bell et al., 2002; Furuya et al., 2005; Amin et al., 2007; Kumar et al., 2011;  
265 Shekhawat et al., 2012; Banerjee et al., 2014; Chiaki et al., 2015; Mukwa et al., 2016). Survey  
266 and sample collection were conducted in banana growing areas in various regions in the  
267 Philippines for BBTV detection and diversity analysis. The banana cultivars wherein BBTV  
268 was isolated include Saba, Lakatan, Latundan, and other unknown varieties.

269

270 Among the sampling sites, Quezon appear to have the most diverse BBTV population as shown  
271 by high nucleotide segregating sites (S), nucleotide diversity ( $\pi$ ), average number of nucleotide  
272 differences (k), haplotype number (h), haplotype diversity (hd), intra-population genetic  
273 distance, and a significant negative Fu's  $F_s$  value. Significant and negative Fu's  $F_s$  was  
274 observed also in Laguna BBTV population, while significant and negative Fu's  $F_s$  and  
275 Tajima's  $D$  values were observed in BBTV population from Batangas. Fu's  $F_s$  is regarded as

276 a more sensitive indicator of population expansion and a more powerful test of neutrality than  
277 the Tajima's  $D$ , which probably contributed to the inconsistent results (Zeng et al., 2006). More  
278 BBTV samples should be collected from different provinces for genetic diversity and  
279 demographic analyses to confirm the results obtained. Overall, significant and highly negative  
280 Fu's  $F_s$  and Tajima's  $D$  were observed using all Philippine BBTV isolates. These results  
281 suggest that there is an excess number of rare alleles in Philippine BBTV isolates, probably  
282 due to its recent population expansion (or from genetic hitchhiking) as evidenced also by  
283 overall high haplotype diversity with relatively low overall nucleotide diversity.

284

285 Haplotype network and phylogenetic analyses of partial DNA-R of combined SEA and  
286 Philippine sequences suggest that geographic location heavily affects the distribution of BBTV  
287 as indicated by geographically proximate haplotypes in each group. Viruses may have evolved  
288 independently mainly because countries are separated by sea, and host movement could have  
289 been limited within the haplotype groupings. The complex haplotype network of BBTV  
290 isolates suggests that the Philippines, as part of SEA, is a hotspot of an on-going BBTV  
291 diversification (Stainton et al., 2015). Furthermore, the Philippines, along with other  
292 neighboring countries such as New Guinea and Indonesia, are believed to be the center of origin  
293 of domesticated bananas (Perrier et al., 2011). This may indicate that the intensive  
294 domestication of bananas within the region might have been a possible driver for the  
295 diversification of BBTV in the country. Meanwhile, the haplotype network analysis revealed  
296 three major haplotype groups (HA, HB, and HC) of BBTV isolates collected in the Philippines.  
297 Interestingly, BBTV isolates from Palawan were only found in the HC group. This province  
298 also has very low haplotype number ( $h$ ) and haplotype diversity ( $hd$ ), and a relatively low  
299 nucleotide diversity ( $\pi$ ). These results could be probably caused by recent population  
300 bottleneck and recent introduction of BBTV in the area due to the movement of planting

301 materials (e.g., Lakatan variety) from other provinces in the Philippines. Due to the strict  
302 quarantine implementation in the province, BBTV has been reported only recently in Palawan.  
303 It appears that the HC group is widespread in the country and was also introduced in Palawan.  
304 Upon inclusion of Philippine and SEA reference sequences in the haplotype network, however,  
305 only the HC group remained distinct wherein few BBTV reference sequences from India and  
306 Indonesia were also included.

307

308 As expected, phylogenetic analysis based on partial DNA-R showed that the collected local  
309 isolates were more closely related with the SEA group (where the Philippines is geographically  
310 classified) than the PIO group (Karan et al., 1994). This could also mean that plant and virus  
311 movement is limited within the SEA region (Karan et al., 1994; Wickramaarachchi 2016).  
312 Philippine BBTV isolates formed a monophyletic clade which suggests a monophyletic origin  
313 of the majority of local isolates from a common SEA ancestor. The collected local isolates also  
314 clustered with Philippine reference sequences which confirms their identity as BBTV and may  
315 indicate that virus movement could be limited in the country (Stainton et al., 2015). In the  
316 phylogenetic tree, the clustering of Philippine BBTV isolates seemed to follow the observed  
317 three haplotype groupings (HA, HB, and HC). However, as shown in the tree, no Philippine  
318 reference sequences appeared to cluster with HC isolates. A more exhaustive survey of  
319 reference sequences in the Philippines will be performed and more BBTV samples in the  
320 Philippines will be sequenced to verify the findings on haplotype groupings and phylogenetic  
321 analysis.

322

323 Some BBTV sequences from Indonesia and India were also clustered within the Philippine  
324 clade (the former clustered with HB and HC isolates, while the latter clustered with HC  
325 isolates), suggestive of sequence homology and possible BBTV movement in these countries.

326 It was previously inferred that the Indian subcontinent is a major contributor to the long-  
327 distance dispersal of BBTv, both as donor and recipient. For instance, the introduction events  
328 of SEA isolates were recently detected between 1976 and 1991 in India (Stainton et al., 2015).  
329 Thus, it may be deduced that there is a probable dispersal event of Philippine BBTv isolates  
330 to India. Outside the Philippine clade, BBTv sequences from Egypt and India (which are  
331 known to be closely related with PIO group) were also clustered in the larger SEA clade,  
332 indicating the presence of isolates that are related with SEA group. On the other hand, reference  
333 sequences from Vietnam and China formed a monophyletic clade and appeared to be separated  
334 from the larger SEA group. Similar observation was reported by Rao (2017) wherein the  
335 constructed DNA-R phylogenetic tree depicts a further separation of BBTv isolates from  
336 China and Vietnam into sub-groups 2, 3, and 4; while the rest of the members of the Asian  
337 group exclusively formed the sub-group 1.

338

339 In summary, the results of this study showed that BBTv is widespread and diverse in the  
340 Philippines and undergoing population expansion. However, more samples and genes should  
341 be analyzed to confirm the results obtained especially at the province level. Additional  
342 reference sequences from the Philippines and other countries with reported BBTv occurrence  
343 will be included in the analysis. Recombination analysis shall be also performed to provide  
344 further understanding regarding the evolutionary history of Philippine BBTv isolates.  
345 Nevertheless, the insights drawn from this research endeavor will provide a framework in the  
346 development of improved BBTv-specific detection marker systems in the country as well  
347 enable the strategic BBTv-resistant variety deployment across various regions in the  
348 Philippines.

349

350

## 351 **Acknowledgment**

352 This research was conducted through funds provided by Philippine Department of Agriculture  
353 - Biotechnology Program Office (DA-BIOTECH) to the project entitled “DA-BIOTECH-  
354 R1902: Fast-tracking the Development of BBTV-resistant Banana Cultivars through Modern  
355 Biotech Tools: Molecular Profiling towards Marker Development and Diagnostics (Phase I)”  
356 and Bill and Melinda Gates Foundation/University of Queensland’s project on “BBTV  
357 mitigation: Community management in Nigeria, and screening wild banana progenitors  
358 for resistance”. We gratefully acknowledge the Institute of Plant Breeding for the use of  
359 facilities and equipment. Also, the authors extend their warmest gratitude to Rodelio R. Pia,  
360 Ronilo M. Bajaro, Wilermie Driz-Hernandez, Reina S. Caro, Don Emanuel M. Cardona,  
361 Rowena B. Frankie, and Jen Daine L. Nocum for the technical and administrative support.

362

## 363 **Conflict of interest**

364 The authors declare no conflict of interests.

365

## 366 **References**

367

368 Amin, I., Qazi, J., Mansoor, S., Ilyas, M., & Briddon, R. W. (2008). Molecular characterisation  
369 of Banana bunchy top virus (BBTV) from Pakistan. *Virus genes*, 36(1), 191-198.

370

371 Anhalt, M. D., & Almeida, R. P. P. (2008). Effect of temperature, vector life stage, and plant  
372 access period on transmission of Banana bunchy top virus to banana. *Phytopathology*, 98(6),  
373 743-748.

374

375 Banerjee, A., Roy, S., Behere, G. T., Roy, S. S., Dutta, S. K., & Ngachan, S. V. (2014).  
376 Identification and characterization of a distinct banana bunchy top virus isolate of Pacific-  
377 Indian Oceans group from North-East India. *Virus Research*, 183, 41-49.

378

379 Bell, K. E., Dale, J. L., Ha, C. V., Vu, M. T., & Reville, P. A. (2002). Characterisation of Rep-  
380 encoding components associated with banana bunchy top nanovirus in Vietnam. *Archives of*  
381 *virology*, 147(4), 695-707.

382

383 Chiaki, Y., Nasir, N., Herwina, H., Sonoda, A., Fukumoto, T., Nakamura, M., & Iwai, H.  
384 (2015). Genetic structure and diversity of the Banana bunchy top virus population on Sumatra  
385 Island, Indonesia. *European journal of plant pathology*, 143(1), 113-122.

- 386  
387 Dale, J. L. (1987). Banana bunchy top: an economically important tropical plant virus disease.  
388 *Advances in virus research*, 33, 301-325.
- 389  
390 Debbarma, R., Kumar, K. K., Sudhakar, D., & Soorianathasundaram, K. (2019). Molecular  
391 characterization of banana bunchy top virus movement protein encoding DNA-M component  
392 isolated from hill banana and Grand Naine. *Electronic Journal of Plant Breeding*, 10(2), 936-  
393 943.
- 394  
395 Furuya, N., Kawano, S., & Natsuaki, K. T. (2005). Characterization and genetic status of  
396 Banana bunchy top virus isolated from Okinawa, Japan. *Journal of General Plant Pathology*,  
397 71(1), 68-73.
- 398  
399 Hoang, D. T., Chernomor, O., Von Haeseler, A., Minh, B. Q., & Vinh, L. S. (2018). UFBoot2:  
400 improving the ultrafast bootstrap approximation. *Molecular biology and evolution*, 35(2), 518-  
401 522.
- 402  
403 Hooks, C. R. R., Wright, M. G., Kabasawa, D. S., Manandhar, R., & Almeida, R. P. P. (2008).  
404 Effect of banana bunchy top virus infection on morphology and growth characteristics of  
405 banana. *Annals of Applied Biology*, 153(1), 1-9.
- 406  
407 Hu, J. S., Wang, M., Sether, D., Xie, W., & Leonhardt, K. W. (1996). Use of polymerase chain  
408 reaction (PCR) to study transmission of banana bunchy top virus by the banana aphid  
409 (*Pentalonia nigronervosa*). *Annals of applied Biology*, 128(1), 55-64.
- 410  
411 Islam, M. N., Naqvi, A. R., Jan, A. T., & Haq, Q. M. R. (2010). Genetic diversity and possible  
412 evidence of recombination among Banana Bunchy Top Virus (BBTV) isolates. *International*  
413 *Research Journal of Microbiology*, 1(1), 1-12.
- 414  
415 Kalyaanamoorthy, S., Minh, B. Q., Wong, T. K., Von Haeseler, A., & Jermin, L. S. (2017).  
416 ModelFinder: fast model selection for accurate phylogenetic estimates. *Nature methods*, 14(6),  
417 587-589.
- 418  
419 Karan, M., Harding, R. M., & Dale, J. L. (1994). Evidence for two groups of banana bunchy  
420 top virus isolates. *Journal of General Virology*, 75(12), 3541-3546.
- 421  
422 Kumar S., Stecher G., Li M., Knyaz C., and Tamura K. (2018). MEGA X: Molecular  
423 Evolutionary Genetics Analysis across computing platforms. *Molecular Biology and Evolution*  
424 35:1547-1549.
- 425  
426 Kumar, P. L., Hanna, R., Alabi, O. J., Soko, M. M., Oben, T. T., Vangu, G. H. P., & Naidu, R.  
427 A. (2011). Banana bunchy top virus in sub-Saharan Africa: investigations on virus distribution  
428 and diversity. *Virus Research*, 159(2), 171-182.
- 429  
430 Kumar, P., Arun, V., & Lokeswari, T. S. (2017). Cloning of BBTV (Banana Bunchy Top  
431 Virus) components and screening of BBTV using functionalized gold nanoparticles. *3 Biotech*,  
432 7(3), 1-12.
- 433  
434 Leigh, J. W., & Bryant, D. (2015). popart: full-feature software for haplotype network  
435 construction. *Methods in Ecology and Evolution*, 6(9), 1110-1116.



436  
437 Molina, A.B., Sinohin, V.G.O., Dela Cueva, F.M., Esguerra, A.V., Crucido, S.S., Vida, E.,  
438 Temanel, B.E., Anit, E.A., Eusebio, J.E. and IRRI, L.B. (2009). Managing banana bunchy top  
439 virus in smallholdings in the Philippines. *Acta Horticulturae*, 828, 383-387.  
440  
441 Mukwa, L. F. T., Gillis, A., Vanhese, V., Romay, G., Galzi, S., Laboureau, N., ... & Bragard,  
442 C. (2016). Low genetic diversity of Banana bunchy top virus, with a sub-regional pattern of  
443 variation, in Democratic Republic of Congo. *Virus genes*, 52(6), 900-905.  
444  
445 Nguyen, L. T., Schmidt, H. A., Von Haeseler, A., & Minh, B. Q. (2015). IQ-TREE: a fast and  
446 effective stochastic algorithm for estimating maximum-likelihood phylogenies. *Molecular*  
447 *biology and evolution*, 32(1), 268-274.  
448  
449 Perrier, X., De Langhe, E., Donohue, M., Lentfer, C., Vrydaghs, L., Bakry, F., ... & Denham,  
450 T. (2011). Multidisciplinary perspectives on banana (*Musa* spp.) domestication. *Proceedings*  
451 *of the National Academy of Sciences*, 108(28), 11311-11318.  
452  
453 Posada, D. (2008). jModelTest: phylogenetic model averaging. *Molecular biology and*  
454 *evolution*, 25(7), 1253-1256.  
455  
456 Qazi, J. (2016). Banana bunchy top virus and the bunchy top disease. *Journal of general plant*  
457 *pathology*, 82(1), 2-11.  
458  
459 Rambaut, A. (2018). FigTree v1. 4.4, a graphical viewer of phylogenetic trees.  
460 <http://tree.bio.ed.ac.uk/software/figtree/>  
461  
462 Rao, X. Q., Wu, Z. L., Zhou, L., Sun, J., & Li, H. P. (2017). Genetic diversity of Banana bunchy  
463 top virus isolates from China. *Acta Virol*, 61, 217-222.  
464  
465 Rozas, J., Ferrer-Mata, A., Sánchez-DelBarrio, J. C., Guirao-Rico, S., Librado, P., Ramos-  
466 Onsins, S. E., & Sánchez-Gracia, A. (2017). DnaSP 6: DNA sequence polymorphism analysis  
467 of large data sets. *Molecular biology and evolution*, 34(12), 3299-3302.  
468  
469 Shekhawat, U. K., Ganapathi, T. R., & Hadapad, A. B. (2012). Transgenic banana plants  
470 expressing small interfering RNAs targeted against viral replication initiation gene display  
471 high-level resistance to banana bunchy top virus infection. *Journal of General Virology*, 93(8),  
472 1804-1813.  
473  
474 Soubrier, J., Steel, M., Lee, M. S., Der Sarkissian, C., Guindon, S., Ho, S. Y., & Cooper, A.  
475 (2012). The influence of rate heterogeneity among sites on the time dependence of molecular  
476 rates. *Molecular Biology and Evolution*, 29(11), 3345-3358.  
477  
478 Stainton, D., Martin, D. P., Muhire, B. M., Lolohea, S., Halafihi, M. I., Lepoint, P., ... &  
479 Varsani, A. (2015). The global distribution of Banana bunchy top virus reveals little evidence  
480 for frequent recent, human-mediated long distance dispersal events. *Virus evolution*, 1(1).  
481  
482 Tamura K. and Nei M. (1993). Estimation of the number of nucleotide substitutions in the  
483 control region of mitochondrial DNA in humans and chimpanzees. *Molecular Biology and*  
484 *Evolution* 10:512-526.  
485

486 Thompson, J. D., Gibson, T. J., & Higgins, D. G. (2003). Multiple sequence alignment using  
487 ClustalW and ClustalX. *Current protocols in bioinformatics*, (1), 2-3.  
488

489 Thomson, D., & Dietzgen, R. G. (1995). Detection of DNA and RNA plant viruses by PCR  
490 and RT-PCR using a rapid virus release protocol without tissue homogenization. *Journal of*  
491 *Virological Methods*, 54(2-3), 85-95.  
492

493 Wickramaarachchi, W. A. R. T., Shankarappa, K. S., Rangaswamy, K. T., Maruthi, M. N.,  
494 Rajapakse, R. G. A. S., & Ghosh, S. (2016). Molecular characterization of banana bunchy top  
495 virus isolate from Sri Lanka and its genetic relationship with other isolates. *VirusDisease*,  
496 27(2), 154-160.  
497

498 Wu, R. Y., & Su, H. J. (1990). Purification and characterization of banana bunchy top virus.  
499 *Journal of Phytopathology*, 128(2), 153-160.  
500

501 Yang, Z. (1995). A space-time process model for the evolution of DNA sequences. *Genetics*,  
502 139(2), 993-1005.  
503

504 Yu, N. T., Zhang, Y. L., Feng, T. C., Wang, J. H., Kulye, M., Yang, W. J., ... & Liu, Z. X.  
505 (2012). Cloning and sequence analysis of two banana bunchy top virus genomes in Hainan.  
506 *Virus Genes*, 44(3), 488-494.  
507

508 Zeng, K., Fu, Y. X., Shi, S., & Wu, C. I. (2006). Statistical tests for detecting positive selection  
509 by utilizing high-frequency variants. *Genetics*, 174(3), 1431-1439.  
510  
511  
512  
513  
514  
515  
516  
517  
518  
519  
520  
521  
522  
523  
524  
525  
526  
527  
528  
529  
530  
531  
532  
533  
534  
535

536 **Table 1.** Collected BBTV Philippine isolates sequenced in this study.  
537

| Isolate         | Location               | Collection Year | Host variety     |
|-----------------|------------------------|-----------------|------------------|
| Balam_Cebu_B22  | Balamban, Cebu         | 2015            | Unknown          |
| Baybay_Ley_B34  | Baybay, Leyte          | 2015            | Unknown          |
| Baybay_Ley_B35  | Baybay, Leyte          | 2015            | Unknown          |
| BenSol_Isab_B18 | Benin Soledad, Isabela | 2015            | Unknown          |
| Calin_Dav_B12   | Calinan, Davao City    | 2015            | Unknown          |
| Calin_Dav_B14   | Calinan, Davao City    | 2015            | Unknown          |
| Can_Que3        | Candelaria, Quezon     | 2019            | Unknown          |
| Can_Que_07      | Candelaria, Quezon     | 2019            | Tordan and Saba  |
| Can_Que_08      | Candelaria, Quezon     | 2019            | Tordan and Saba  |
| Can_Que_11      | Candelaria, Quezon     | 2019            | Tordan and Saba  |
| Can_Que_12      | Candelaria, Quezon     | 2019            | Tordan and Saba  |
| Can_Que13       | Candelaria, Quezon     | 2019            | Tordan and Saba  |
| Can_Que15       | Candelaria, Quezon     | 2019            | Tordan and Saba  |
| Diffun_Qui_B19  | Diffun, Quirino        | 2015            | Unknown          |
| Luc_Que_01      | Lucban, Quezon         | 2019            | Unknown          |
| Luc_Que_02      | Lucban, Quezon         | 2019            | Unknown          |
| Luc_Que_05      | Lucban, Quezon         | 2019            | Lakatan Tagalog  |
| Luc_Que4        | Lucban, Quezon         | 2019            | Lakatan Tagalog  |
| Luc_Que10       | Lucban, Quezon         | 2019            | Lakatan Tagalog  |
| Luc_Que6        | Lucban, Quezon         | 2019            | Lakatan Tagalog  |
| Luis_Lag_04     | Luisiana, Laguna       | 2019            | Lakatan          |
| Luis_Lag_07     | Luisiana, Laguna       | 2019            | Lakatan          |
| Luis_Lag_08     | Luisiana, Laguna       | 2019            | Lakatan          |
| Luis_Lag6       | Luisiana, Laguna       | 2019            | Lakatan          |
| Luis_Lag7       | Luisiana, Laguna       | 2019            | Lakatan          |
| Magda_Lag_B10   | Magdalena, Laguna      | 2015            | Unknown          |
| Naga_Cebu_B24   | Naga, Cebu             | 2015            | Unknown          |
| Orm_Ley_B31     | Ormoc, Leyte           | 2015            | Unknown          |
| Orm_Ley_B32     | Ormoc, Leyte           | 2015            | Unknown          |
| Orm_Ley_B32b    | Ormoc, Leyte           | 2015            | Unknown          |
| Pagsan_Lag_01   | Pagsanjan, Laguna      | 2019            | Saba             |
| Pagsan_Laguna2  | Pagsanjan, Laguna      | 2019            | Saba             |
| Rizal_Cag_B16   | Rizal, Cagayan         | 2015            | Unknown          |
| Roxas_Pal_01    | Roxas, Palawan         | 2019            | Lakatan and Saba |
| Roxas_Pal_03    | Roxas, Palawan         | 2019            | Lakatan and Saba |
| Roxas_Pal_04    | Roxas, Palawan         | 2019            | Lakatan and Saba |
| Roxas_Pal_05    | Roxas, Palawan         | 2019            | Lakatan and Saba |
| Roxas_Pal_07    | Roxas, Palawan         | 2019            | Lakatan          |
| Roxas_Pal12     | Roxas, Palawan         | 2019            | Lakatan          |
| Roxas_Pal15     | Roxas, Palawan         | 2019            | Lakatan          |
| Roxas_16        | Roxas, Palawan         | 2019            | Lakatan          |

|                 |                    |      |          |
|-----------------|--------------------|------|----------|
| Roxas_Pal2      | Roxas, Palawan     | 2019 | Lakatan  |
| Roxas_Pal5      | Roxas, Palawan     | 2019 | Lakatan  |
| Talisay_Bat_08  | Talisay, Batangas  | 2019 | Saba     |
| Talisay_Bat_09  | Talisay, Batangas  | 2019 | Saba     |
| Talisay_Bat_10  | Talisay, Batangas  | 2019 | Saba     |
| Talisay_Bat_10b | Talisay, Batangas  | 2019 | Saba     |
| Talisay_Bat3    | Talisay, Batangas  | 2019 | Saba     |
| Talisay_Bat4    | Talisay, Batangas  | 2019 | Saba     |
| Talisay_Bat6    | Talisay, Batangas  | 2019 | Saba     |
| Tanauan_Bat_11  | Tanauan, Batangas  | 2019 | Latundan |
| Tanauan_Bat_16  | Tanauan, Batangas  | 2019 | Latundan |
| Tanauan_Bat_17  | Tanauan, Batangas  | 2019 | Latundan |
| Tanauan_Bat_18  | Tanauan, Batangas  | 2019 | Latundan |
| Tanauan_Bat_20  | Tanauan, Batangas  | 2019 | Latundan |
| Tanauan_Bat19   | Tanauan, Batangas  | 2019 | Latundan |
| Tanauan_Bat11   | Tanauan, Batangas  | 2019 | Latundan |
| Tanay_Riz_B01   | Tanay, Rizal       | 2015 | Unknown  |
| Tanay_Riz_B02   | Tanay, Rizal       | 2015 | Unknown  |
| Tanay_Riz_B03   | Tanay, Rizal       | 2015 | Unknown  |
| Tanay_Riz_B04   | Tanay, Rizal       | 2015 | Unknown  |
| Tugbok_Dav_B11  | Tugbok, Davao City | 2015 | Unknown  |
| Tugbok_Dav_B13  | Tugbok, Davao City | 2015 | Unknown  |
| Tugbok_Dav_B15  | Tugbok, Davao City | 2015 | Unknown  |

---

538  
539  
540

**Table 2.** Parameters of genetic diversity and demographic analysis using DNA-R gene of BBTV populations isolated in the Philippines.

| Location             | n  | S  |     |         | $\pi$ (SD)        | k       | h  | hd (SD)       | Fu's $F_s$ |                        | Tajima's $D$ |                 |
|----------------------|----|----|-----|---------|-------------------|---------|----|---------------|------------|------------------------|--------------|-----------------|
|                      |    | SS | PIS | Total S |                   |         |    |               | $F_s$      | $P$ value <sup>a</sup> | $D$          | Significance    |
| <b>Cagayan</b>       | 1  | -  | -   | -       | -                 | -       | -  | -             | -          | -                      | -            | -               |
| <b>Isabela</b>       | 1  | -  | -   | -       | -                 | -       | -  | -             | -          | -                      | -            | -               |
| <b>Quirino</b>       | 1  | -  | -   | -       | -                 | -       | -  | -             | -          | -                      | -            | -               |
| <b>Batangas</b>      | 14 | 23 | 5   | 28      | 0.00653 (0.00133) | 5.07692 | 12 | 0.967 (0.044) | -5.478     | 0.00400                | -1.80970     | $P < 0.05^*$    |
| <b>Laguna</b>        | 8  | 7  | 5   | 12      | 0.00567 (0.00057) | 4.39286 | 8  | 1.000 (0.063) | -4.309     | 0.00602                | -0.25574     | $P > 0.10^{ns}$ |
| <b>Rizal</b>         | 4  | 6  | 0   | 6       | 0.00385 (0.00167) | 3.00000 | 3  | 0.833 (0.222) | 0.731      | 0.62381                | -0.80861     | $P > 0.10^{ns}$ |
| <b>Quezon</b>        | 13 | 15 | 10  | 25      | 0.00893 (0.00162) | 6.89744 | 12 | 0.987 (0.035) | -5.026     | 0.01200                | -0.90389     | $P > 0.10^{ns}$ |
| <b>Palawan</b>       | 10 | 8  | 3   | 11      | 0.00416 (0.00158) | 3.22222 | 3  | 0.644 (0.101) | 3.321      | 0.94790                | -0.76710     | $P > 0.10^{ns}$ |
| <b>Cebu</b>          | 2  | 6  | 0   | 6       | 0.00772 (0.00386) | 6.00000 | 2  | 1.000 (0.500) | 1.792      | 0.53944                | -            | -               |
| <b>Leyte</b>         | 5  | 8  | 0   | 8       | 0.00411 (0.00162) | 3.20000 | 3  | 0.700 (0.218) | 1.458      | 0.75358                | -1.17432     | $P > 0.10^{ns}$ |
| <b>Davao del Sur</b> | 5  | 5  | 7   | 12      | 0.00798 (0.00164) | 6.20000 | 5  | 1.000 (0.126) | -1.011     | 0.15015                | 0.55247      | $P > 0.10^{ns}$ |
| <b>ALL</b>           | 64 | 37 | 22  | 59      | 0.00721 (0.00053) | 5.51984 | 41 | 0.971 (0.011) | -33.210    | 0.00000                | -1.98369     | $P < 0.05^*$    |

n=no. of BBTV sequences; S=segregating sites; SS=singleton sites; PIS=parsimony informative sites;  $\pi$ =nucleotide diversity; k=average no. of nucleotide differences, h=no. of haplotypes; hd=haplotype diversity; SD=standard deviation; \*=significant; <sup>a</sup> should be regarded as significant (5% level) if  $P < 0.02$ .

**Table 3.** Estimates of evolutionary divergence (inter- and intra-population genetic distance) of BBTV populations collected in the Philippines.

| Location                                     | Inter-population genetic distance |         |         |               |         |         |         |         |         |          | Intra-population genetic distance |         |
|----------------------------------------------|-----------------------------------|---------|---------|---------------|---------|---------|---------|---------|---------|----------|-----------------------------------|---------|
|                                              | Cebu                              | Leyte   | Isabela | Davao del Sur | Quezon  | Quirino | Laguna  | Cagayan | Palawan | Batangas | Distance                          | SE      |
| <b>Cebu</b>                                  |                                   |         |         |               |         |         |         |         |         |          | 0.00513                           | 0.00259 |
| <b>Leyte</b>                                 | 0.00644                           |         |         |               |         |         |         |         |         |          | 0.00360                           | 0.00142 |
| <b>Isabela</b>                               | 0.01037                           | 0.01011 |         |               |         |         |         |         |         |          | -                                 | -       |
| <b>Davao del Sur</b>                         | 0.00592                           | 0.00618 | 0.00959 |               |         |         |         |         |         |          | 0.00566                           | 0.00196 |
| <b>Quezon</b>                                | 0.00700                           | 0.00769 | 0.01017 | 0.00705       |         |         |         |         |         |          | 0.00809                           | 0.00201 |
| <b>Quirino</b>                               | 0.00644                           | 0.00618 | 0.00385 | 0.00566       | 0.00645 |         |         |         |         |          | -                                 | -       |
| <b>Laguna</b>                                | 0.00499                           | 0.00628 | 0.01020 | 0.00596       | 0.00711 | 0.00628 |         |         |         |          | 0.00392                           | 0.00140 |
| <b>Cagayan</b>                               | 0.00514                           | 0.00489 | 0.00516 | 0.00437       | 0.00555 | 0.00128 | 0.00627 |         |         |          | -                                 | -       |
| <b>Palawan</b>                               | 0.00789                           | 0.00763 | 0.00790 | 0.00680       | 0.00769 | 0.00400 | 0.00885 | 0.00271 |         |          | 0.00370                           | 0.00126 |
| <b>Batangas</b>                              | 0.00707                           | 0.00865 | 0.01112 | 0.00781       | 0.00838 | 0.00737 | 0.00570 | 0.00831 | 0.01022 |          | 0.00619                           | 0.00143 |
| <b>Rizal</b>                                 | 0.00595                           | 0.00534 | 0.00614 | 0.00489       | 0.00613 | 0.00225 | 0.00676 | 0.00096 | 0.00368 | 0.00894  | 0.00192                           | 0.00107 |
| <b>Mean distance (SE): 0.00722 (0.00162)</b> |                                   |         |         |               |         |         |         |         |         |          |                                   |         |

SE=standard error

1  
2  
3  
4  
5  
6  
7  
8  
9  
10  
11  
12  
13  
14  
15  
16  
17  
18  
19  
20  
21  
22  
23  
24  
25  
26  
27  
28  
29  
30  
31  
32  
33  
34  
35  
36  
37  
38  
39  
40  
41  
42  
43  
44  
45  
46  
47  
48  
49  
50

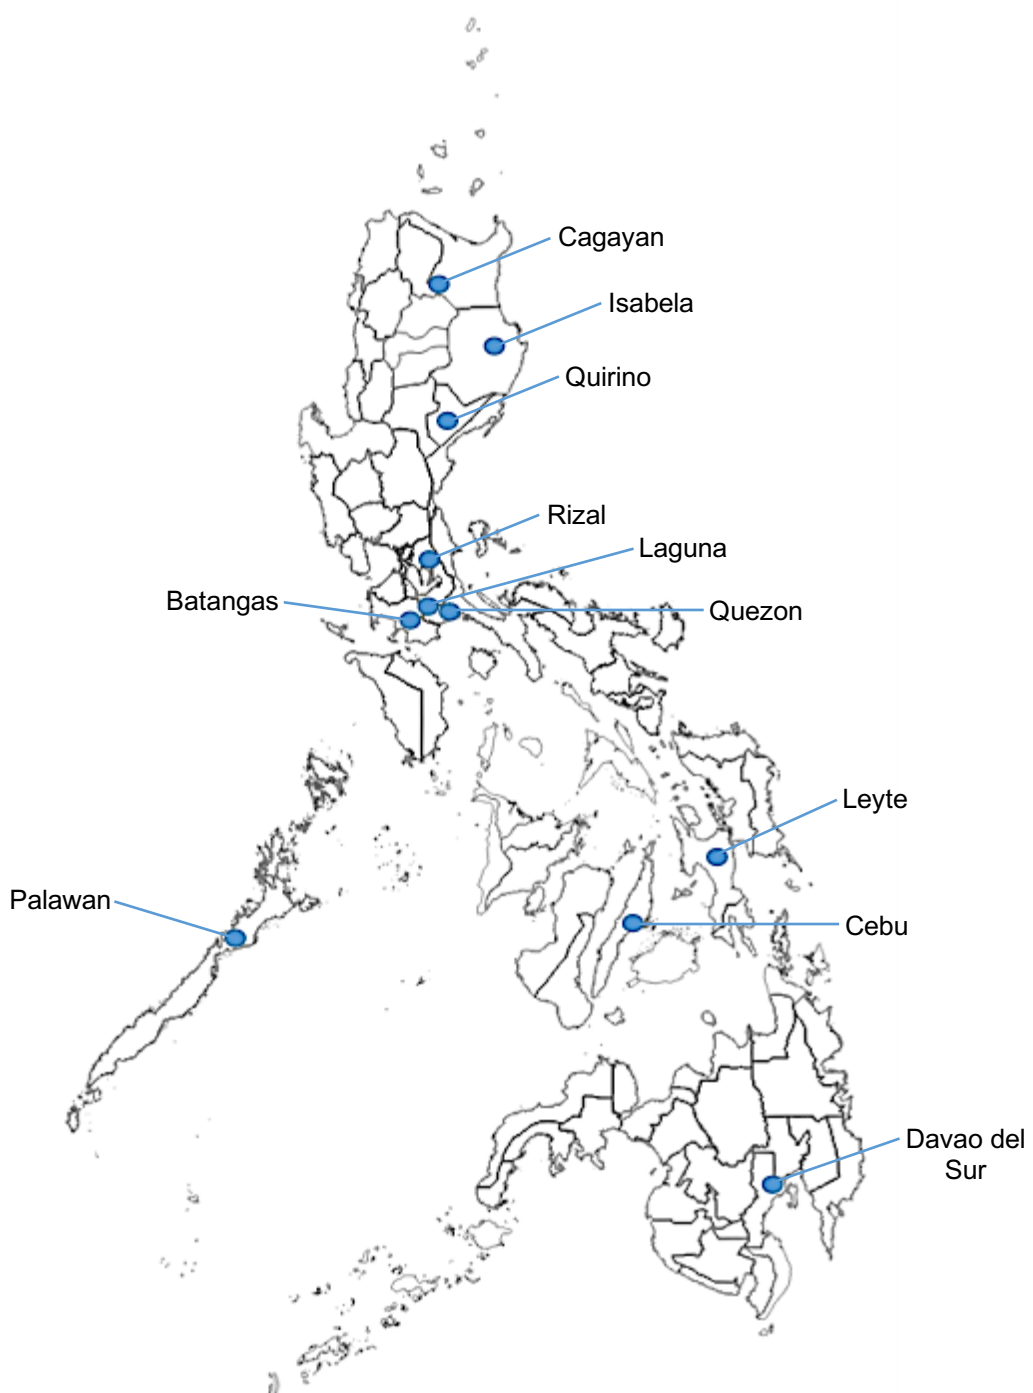

**Figure 1.** Geographical distribution of BBTB collected from banana-growing areas in the Philippines.

51  
52  
53  
54  
55  
56  
57  
58  
59  
60  
61  
62  
63  
64  
65  
66  
67  
68  
69  
70  
71  
72  
73  
74  
75  
76  
77  
78  
79  
80  
81  
82  
83  
84  
85  
86  
87  
88  
89  
90  
91  
92  
93  
94  
95  
96  
97  
98  
99  
100

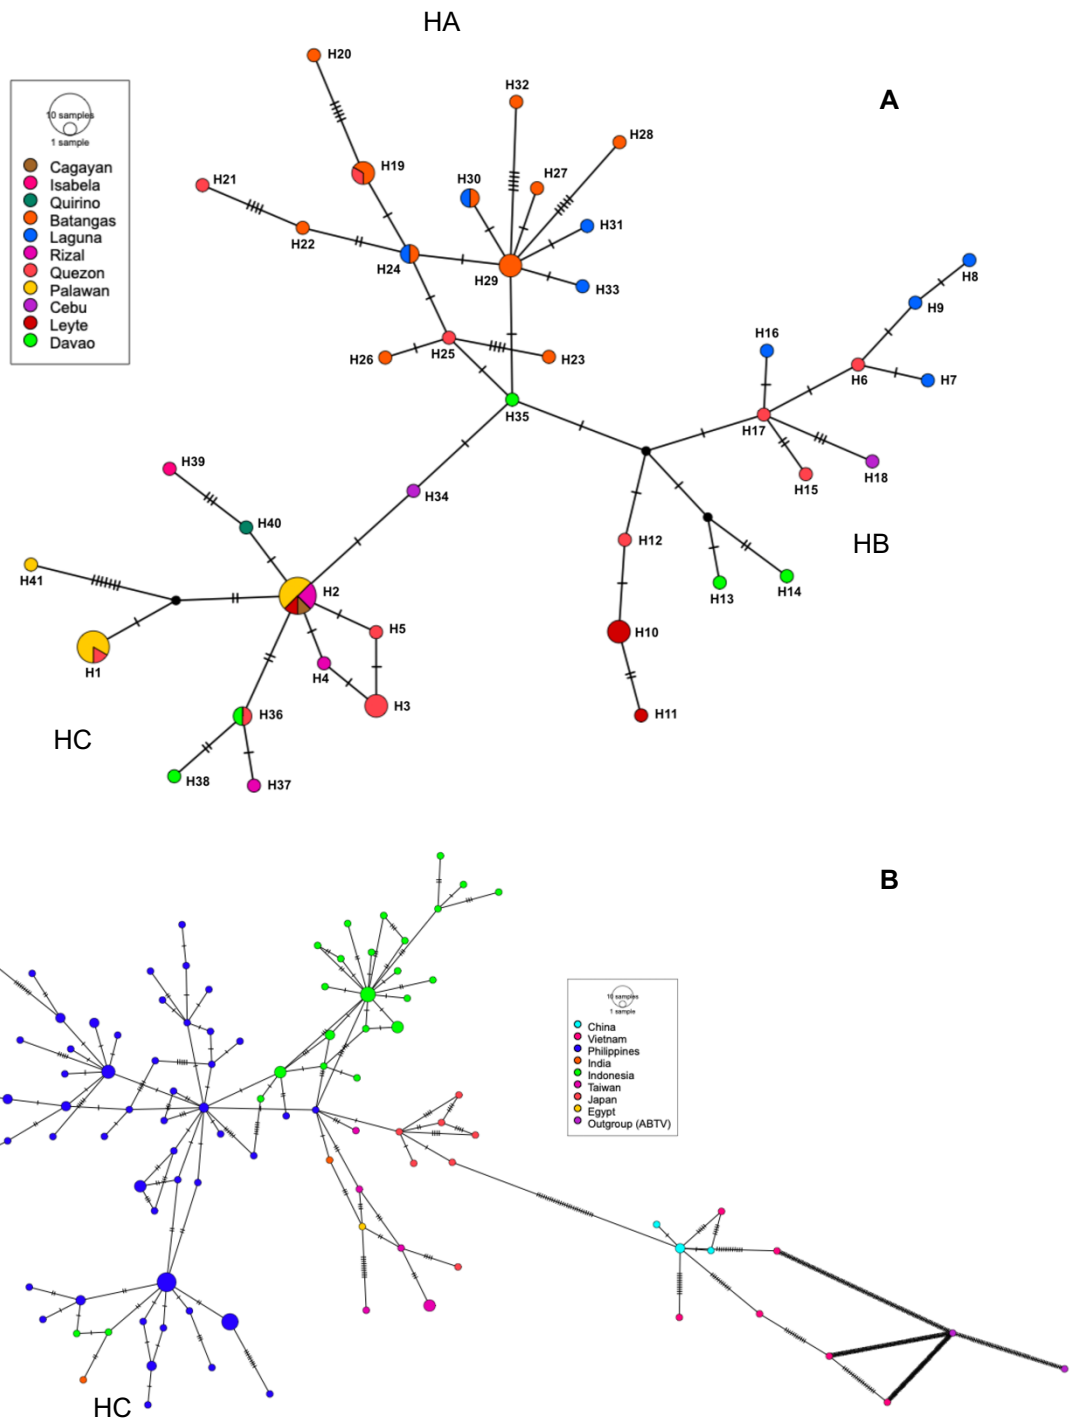

**Figure 2.** Haplotype network based on partial DNA-R sequence of BBTV constructed using PopART (Leigh and Bryant, 2015): median joining network of the collected Philippine isolates (A) and minimum spanning network of collected isolates with Philippine and other SEA reference sequences (B). Haplotype Groups: HA, HB, HC.



101  
102  
103  
104  
105  
106  
107  
108  
109  
110  
111  
112  
113  
114  
115  
116  
117  
118  
119  
120  
121  
122  
123  
124  
125  
126  
127  
128  
129  
130  
131  
132  
133  
134  
135  
136  
137  
138  
139  
140  
141  
142  
143  
144  
145  
146  
147  
148  
149  
150

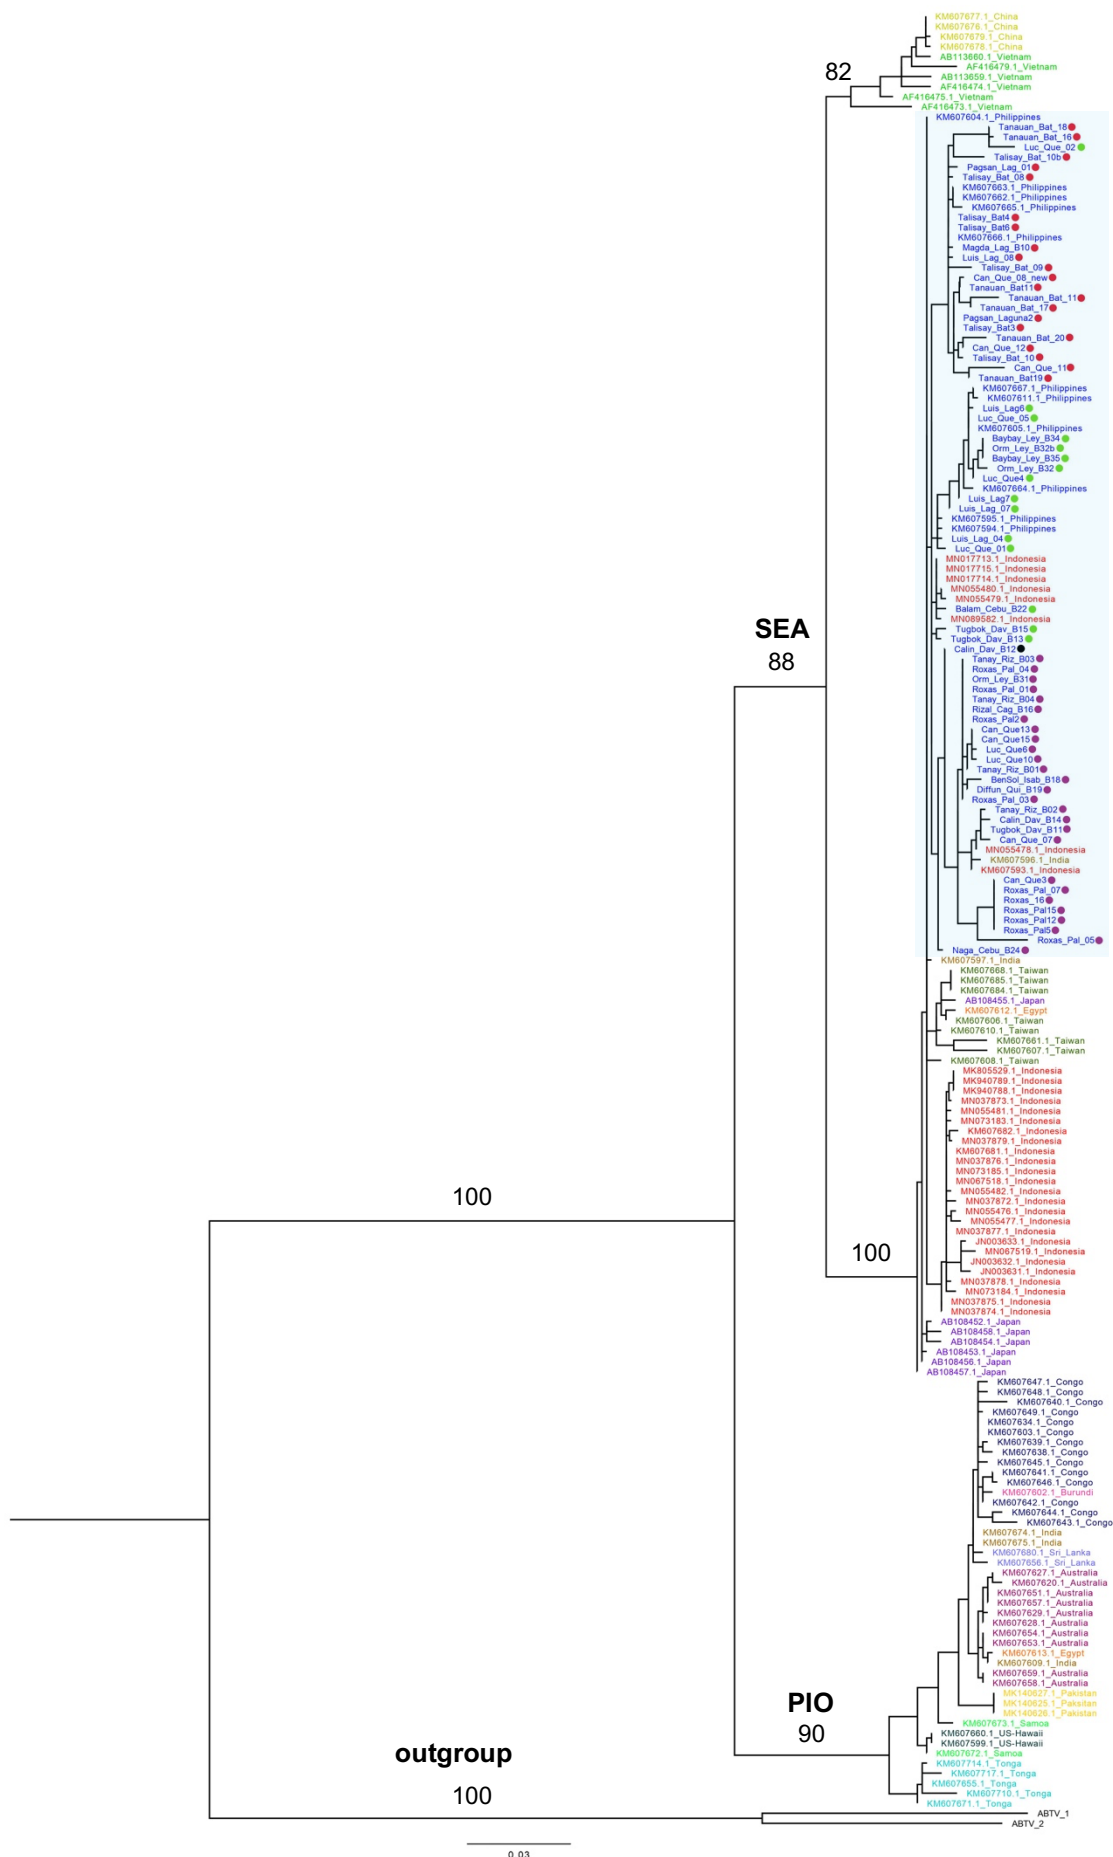

151 **Figure 3.** Maximum likelihood phylogenetic tree constructed using IQ-TREE from the partial  
152 DNA-R sequence alignment of collected Philippine BBTV isolates and published Philippine,  
153 SEA, and PIO reference sequences. Best-fit model was selected according to BIC using  
154 ModelFinder (Kalyaanamoorthy et al., 2017). The tree was generated using TIM 2 model  
155 (AC=AT, CG=GT and unequal base frequency; Posada 2008) with empirical base frequencies  
156 (+F) and FreeRate heterogeneity across sites model (+R3) (Yang, 1995; Soubrier et al., 2012).  
157 The tree was tested with 1,000 replicates of ultrafast bootstrapping (Hoang et al., 2018) and  
158 visualized using FigTree (v1.4.4) (Rambaut 2018). The numbers in the branches are bootstrap  
159 support values. Clade highlighted in blue contains the collected Philippine BBTV isolates with  
160 colored dots corresponding to haplotype grouping: red dot = HA, green dot = HB, and purple  
161 dot = HC. SEA = Southeast Asian group, PIO = Pacific-Indian Oceans group. ABTV sequences  
162 served as outgroups.  
163
